# Supplementary material for: Modulation of LAT1 (SLC7A5) transporter activity and stability by membrane cholesterol
Source: PubMed Central journal article supplement (PMC5341093; doi:10.1038/srep43580), 2017-03-08

Supplementary Figure 1: Original full-length western blots used for Figure 2B.

Modulation of LAT1 (SLC7A5) transporter activity and stability by membrane cholesterol

David Dickens<sup>1^\*</sup>, George N. Chiduzza<sup>2^\*</sup>, Gareth S. A. Wright<sup>2</sup>, Munir Pirmohamed<sup>1</sup>, Svetlana V.

Antonyuk<sup>2</sup>, and S. Samar Hasnain<sup>2\*</sup>

^=equal contribution

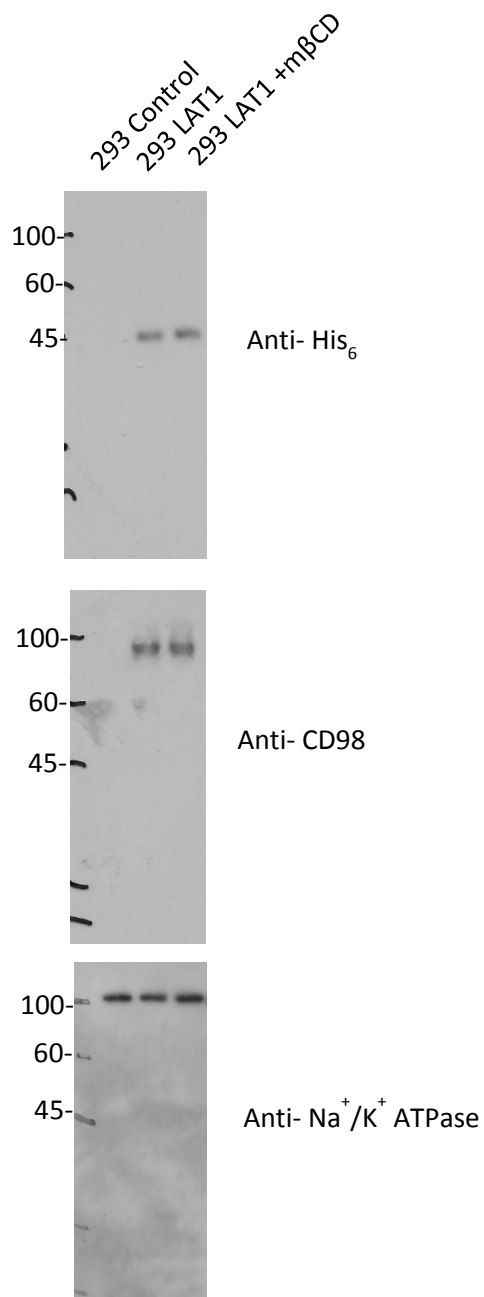

Supplement: srep43580-s1.pdf [file srep43580-s1.pdf]
